# Supplementary material for: Agro-Morphological Characterization and Nutritional Profiling of Traditional Himalayan Crop Landraces for Their Promotion Toward Mainstream Agriculture
Source: Front Plant Sci. 2022 Jun 22;13:898220. doi: 10.3389/fpls.2022.898220 (PMC9258745; doi:10.3389/fpls.2022.898220)
Supplement: Supplementary file 2 [file Data_Sheet_2.xlsx]

## Sheet: Sheet1
Supplementary Table 1. 3-dimensional representation space and comparative analysis revealing relationship among agro-morphological characteristics and nutritional attributes in traditional crop landraces.
Maize landraces									Paddy landraces									Finger millet landraces									Buckwheat landraces									Naked barley landraces
	Dim1	Dim2	Dim3							Dim1	Dim2	Dim3							Dim1	Dim2	Dim3							Dim1	Dim2	Dim3							Dim1	Dim2	Dim3
Ash	77.3878	-137.275	107.866						Ash	64.8434	60.2031	45.8178						Ash	24.932	98.723	101.61						Ash	-9.28138	16.0609	52.5612						Ash	16.8942	5.92358	65.7474
Fat	72.1719	-126.644	101.843						Fat	61.0189	58.0131	43.4923						Fat	24.857	98.4742	101.437						Fat	-7.41672	15.3084	43.5652						Fat	16.5147	5.78285	64.516
Moisture	77.4396	-128.303	105.515						Moisture	54.5343	52.5351	40.4788						Moisture	24.8162	95.5626	98.8832						Moisture	-5.11707	10.0352	38.2105						Moisture	15.2895	4.59803	63.336
Protein	73.5033	-115.088	94.0749						Protein	43.1973	45.5832	30.7797						Protein	24.2877	91.2549	95.2612						Protein	-2.47349	6.87152	32.3861						Protein	13.0896	-0.0611277	45.3226
DT	2.04367	5.40372	-23.3056						Amylose	1.24853	24.8733	31.4482						DF	1.54747	-20.4781	-0.749748						Starch	-7.61366	15.1709	44.8954						Starch	11.9464	0.638385	45.3938
DS	-0.377768	22.0274	-39.9801						Amylopectin	-65.5673	-34.4138	-54.0379						FL	-102.529	-344.207	-445.434						Flavonoids	-9.62996	27.3764	30.6575						Flavonoids	18.2316	6.70932	68.621
EL	48.9504	-81.4533	62.4916						Phytic acid	64.9843	59.7552	46.4453						FW	22.4279	74.6354	81.7635						DF	7.17023	-5.35205	-43.1543						DE	10.3626	4.56286	53.6855
EH	-128.804	91.3022	-122.133						DF	-76.7679	-96.2434	-78.5715						NT	24.6193	95.8511	99.3479						LL	-6.67051	9.25362	39.0092						DH	-33.485	-5.40498	-94.6989
PH	-216.9	423.215	-225.108						LL	-18.8105	-23.646	-12.1817						NGPS	-21.1168	-86.2536	-65.5232						LW	-6.43012	7.59029	36.2732						NGPS	-7.97077	-10.8991	-42.6895
DM	-63.1117	136.546	-123.196						LW	64.0013	58.9756	45.2428						PH	-15.7274	-47.6616	-29.6973						CL	-9.14566	14.7452	49.9279						PH	-19.4163	-9.31515	-96.4747
SW	57.6966	-89.7313	61.9307						NT	47.9121	44.4753	32.0982						DM	-8.11471	-55.9005	-36.8987						PEL	-5.56168	13.4222	38.6749						DM	-45.7923	2.82328	-170.696
									PAH	22.1404	30.6892	19.8575															PH	53.6138	-71.4052	-219.397						SW	4.33588	-5.358	-2.06323
Pair	Dissimilarity	Disparity	Distance	Rank (Dissimilarity)	Rank (Disparity)	Rank (Distance)			PH	-160.493	-170.736	-99.7106						Pair	Dissimilarity	Disparity	Distance	Rank (Dissimilarity)	Rank (Disparity)	Rank (Distance)			DM	13.488	-63.5777	-156.791
Fat - Moisture	6.8378	6.8378	6.63238	1	1	1			DM	-165.008	-167.468	-135.22						Ash - Fat	0.315192	0.315192	0.311828	1	1	1			SW	-4.93182	4.50034	13.1812						Pair	Dissimilarity	Disparity	Distance	Rank (Dissimilarity)	Rank (Disparity)	Rank (Distance)
Ash - Moisture	9.25866	9.25866	9.2745	2	2	2			SW	62.7669	57.4039	44.0609						Moisture - NT	0.589519	0.589519	0.581324	2	2	2												Ash - Fat	1.31004	1.31004	1.29619	1	1	1
EL - SW	12.3676	12.3676	12.0555	3	3	3												Fat - NT	3.35821	3.35821	3.36195	3	3	3			Pair	Dissimilarity	Disparity	Distance	Rank (Dissimilarity)	Rank (Disparity)	Rank (Distance)			Protein - Starch	1.34246	1.34246	1.34207	2	2	2
Ash - Fat	13.7218	13.7218	13.2849	4	4	4			Pair	Dissimilarity	Disparity	Distance	Rank (Dissimilarity)	Rank (Disparity)	Rank (Distance)			Ash - NT	3.65881	3.65881	3.66893	4	4	4			Fat - Starch	1.37993	1.37993	1.35162	1	1	1			Fat - Moisture	2.04952	2.04952	2.07302	3	3	3
Fat - Protein	13.8618	13.8618	13.988	5	5	5			Ash - Phytic acid	0.816377	0.816377	0.78372	1	1	1			Fat - Moisture	3.87349	3.87349	3.8733	5	5	5			Moisture - LL	1.93481	1.93481	1.91364	2	2	2			Ash - Moisture	3.27888	3.27888	3.18545	4	4	4
Moisture - Protein	18.217	18.217	17.9171	6	6	6			Ash - LW	1.59258	1.59258	1.59582	2	2	2			Ash - Moisture	4.16952	4.16952	4.17551	6	6	6			Ash - CL	3.12512	3.12512	2.94687	3	3	3			Ash - Flavonoids	3.33962	3.33962	3.26554	5	5	5
DT - DS	24.6374	24.6374	23.6696	7	7	7			Phytic acid - LW	1.78107	1.78107	1.73782	3	3	3			Moisture - Protein	5.66683	5.66683	5.65287	7	7	7			LL - LW	3.27153	3.27153	3.21091	4	4	4			Fat - Flavonoids	4.64172	4.64172	4.54502	6	6	6
Ash - Protein	26.5731	26.5731	26.411	8	8	8			Fat - SW	1.96235	1.96235	1.93649	4	4	4			Protein - NT	6.13402	6.13402	6.15927	8	8	8			Moisture - LW	3.3834	3.3834	3.38447	5	5	5			Moisture - Flavonoids	6.59809	6.59809	6.40665	7	7	7
Protein - SW	44.0845	44.0845	43.8868	9	9	9			LW - SW	2.35321	2.35321	2.32181	5	5	5			Fat - Protein	9.46858	9.46858	9.51773	9	9	9			Moisture - PEL	3.51957	3.51957	3.44746	6	6	6			Starch - DE	9.36429	9.36429	9.30931	8	8	8
Protein - EL	52.6419	52.6419	52.265	10	10	10			Fat - LW	3.58469	3.58469	3.58964	6	6	6			Ash - Protein	9.77615	9.77615	9.82298	10	10	10			LL - PEL	4.35101	4.35101	4.32645	7	7	7			Protein - DE	10.0093	10.0093	9.93766	9	9	9
Fat - SW	56.1194	56.1194	56.259	11	11	11			Ash - SW	3.88828	3.88828	3.9031	7	7	7			PH - DM	13.3991	13.3991	13.3302	11	11	11			Starch - CL	5.31492	5.31492	5.27774	8	8	8			Moisture - DE	10.6614	10.6614	10.8355	10	10	10
Moisture - SW	61.0363	61.0363	61.4589	12	12	12			Phytic acid - SW	4.04866	4.04866	4.0163	8	8	8			Protein - FW	21.4371	21.4371	21.4908	12	12	12			Protein - LW	5.68342	5.68342	5.59299	9	9	10			Fat - DE	12.4746	12.4746	12.5154	11	11	11
Fat - EL	64.4123	64.4123	64.2649	13	13	13			Ash - Fat	5.03967	5.03967	4.98311	9	9	9			Moisture - FW	27.0537	27.0537	27.1429	13	13	13			Fat - PEL	5.70381	5.70381	5.56008	10	10	9			Ash - DE	13.778	13.778	13.7841	12	12	12
Ash - SW	68.696	68.696	68.9794	14	14	14			Fat - Phytic acid	5.15364	5.15364	5.24211	10	10	11			FW - NT	27.5423	27.5423	27.6428	14	14	14			LW - PEL	6.2775	6.2775	6.36657	11	11	11			DH - PH	14.7777	14.7777	14.7096	13	13	13
Moisture - EL	69.7921	69.7921	69.6964	15	15	15			Protein - NT	5.1554	5.1554	5.01952	11	11	10			Fat - FW	30.8944	30.8944	31.004	15	15	15			Fat - CL	6.64081	6.64081	6.61737	12	12	12			Flavonoids - DE	17.098	17.098	17.0176	14	14	14
Ash - EL	77.3345	77.3345	77.3534	16	16	16			Fat - Moisture	9.10891	9.10891	9.00772	12	12	12			Ash - FW	31.1989	31.1989	31.3106	16	16	16			Starch - PEL	6.85612	6.85612	6.77961	13	13	13			Moisture - Starch	18.828	18.828	18.6756	15	15	15
EH - DM	79.4849	79.4849	79.7724	17	17	17			Moisture - SW	10.2723	10.2723	10.2133	13	13	13			DF - PH	43.4343	43.4343	43.305	17	17	17			Moisture - Protein	7.16086	7.16086	7.1359	14	14	14			Moisture - Protein	18.967	18.967	18.7358	16	16	16
DT - EL	131.032	131.032	130.788	18	18	18			Moisture - LW	12.4965	12.4965	12.4016	14	14	14			NGPS - DM	43.4626	43.4626	43.7004	18	18	18			Fat - LL	7.59207	7.59207	7.6141	15	15	15			Fat - Starch	20.2395	20.2395	20.3223	17	17	17
DT - SW	139.679	139.679	139.331	19	19	19			Moisture - NT	13.3975	13.3975	13.3809	15	15	15			DF - DM	51.4296	51.4296	51.5252	19	19	19			Fat - Moisture	7.86511	7.86511	7.85928	16	16	16			Fat - Protein	20.2751	20.2751	20.3537	18	18	18
DS - EL	153.518	153.518	153.759	20	20	20			Ash - Moisture	13.9722	13.9722	13.9133	16	16	16			NGPS - PH	53.3057	53.3057	52.9328	20	20	20			Ash - Starch	7.86729	7.86729	7.89549	17	17	17			Ash - Starch	21.48	21.48	21.6028	19	19	19
DS - DM	155.364	155.364	154.838	21	21	21			Moisture - Phytic acid	14.1609	14.1609	14.0332	17	17	17			DF - NGPS	94.8683	94.8683	95.0562	21	21	21			Protein - LL	8.2112	8.2112	8.19482	18	18	18			Ash - Protein	21.4882	21.4882	21.621	20	20	20
DS - SW	162.194	162.194	162.014	22	22	22			Moisture - Protein	16.4906	16.4906	16.46	18	18	18			DF - FW	127.407	127.407	127.636	22	22	22			Starch - LL	8.41289	8.41289	8.39948	19	19	19			Protein - Flavonoids	24.4899	24.4899	24.8012	21	21	21
DS - EH	166.92	166.92	167.455	23	23	23			Fat - NT	22.1028	22.1028	22.0201	19	19	19			Protein - DF	148.808	148.808	149.062	23	23	23			Moisture - Starch	8.78534	8.78534	8.79184	20	20	20			Starch - Flavonoids	24.5607	24.5607	24.8166	22	22	22
DT - DM	177.254	177.254	177.261	24	24	24			NT - SW	23.0469	23.0469	23.0417	20	20	20			Moisture - DF	154.429	154.429	154.705	24	24	24			Ash - Fat	9.18858	9.18858	9.21796	21	21	21			NGPS - SW	42.7432	42.7432	42.8095	23	23	23
Protein - DT	182.636	182.636	182.765	25	25	25			Amylose - PAH	24.4309	24.4309	24.5894	21	21	21			DF - NT	154.926	154.926	155.191	25	25	25			Protein - PEL	9.74679	9.74679	9.59154	22	22	22			Starch - SW	48.3394	48.3394	48.436	24	24	24
DT - EH	185.663	185.663	185.112	26	26	26			Fat - Protein	25.1739	25.1739	25.1739	22	22	22			Fat - DF	158.273	158.273	158.541	26	26	26			Fat - LW	10.6787	10.6787	10.6638	23	23	23			Protein - SW	48.4192	48.4192	48.4778	25	25	25
Fat - DT	195.03	195.03	194.979	27	27	27			LW - NT	25.3523	25.3523	25.3357	23	23	23			Ash - DF	158.579	158.579	158.85	27	27	27			Starch - LW	11.5792	11.5792	11.5416	24	24	24			NGPS - PH	54.7664	54.7664	55.0123	26	26	26
Moisture - DT	200.242	200.242	200.392	28	28	28			Protein - SW	26.3387	26.3387	26.4403	24	24	24			FW - PH	169.545	169.545	169.811	28	28	28			CL - PEL	11.7357	11.7357	11.8838	25	25	25			DE - SW	56.7849	56.7849	56.9444	27	27	27
Protein - DS	205.124	205.124	205.499	29	29	29			Ash - NT	26.8947	26.8947	26.8749	25	25	25			FW - DM	178.706	178.706	179.034	29	29	29			LL - CL	12.5856	12.5856	12.47	26	26	26			DH - NGPS	58.4893	58.4893	58.1905	28	28	28
Ash - DT	207.872	207.872	207.942	30	30	30			Phytic acid - NT	27.0336	27.0336	27.0328	26	26	26			Protein - PH	190.82	190.82	191.085	30	30	30			Moisture - CL	13.2214	13.2214	13.2556	27	27	27			Moisture - SW	67.0773	67.0773	67.0534	29	29	29
Fat - DS	217.475	217.475	217.9	31	31	31			Protein - PAH	28.3381	28.3381	28.0093	27	27	27			Moisture - PH	196.459	196.459	196.697	31	31	31			Ash - PEL	14.5822	14.5822	14.6161	28	28	28			Fat - SW	68.5679	68.5679	68.5947	30	30	30
Moisture - DS	222.648	222.648	223.212	32	32	32			Protein - LW	28.5963	28.5963	28.6591	28	28	28			NT - PH	196.949	196.949	197.171	32	32	32			Fat - Protein	14.8473	14.8473	14.8523	29	29	29			Ash - SW	69.8162	69.8162	69.8804	31	31	31
Ash - DS	230.241	230.241	230.831	33	33	33			Ash - Protein	30.1273	30.1273	30.1404	29	29	29			Protein - DM	200.09	200.09	200.427	33	33	33			Ash - LL	15.4214	15.4214	15.3888	30	30	30			Flavonoids - SW	72.8886	72.8886	73.0409	32	32	32
EL - DM	307.884	307.884	307.508	34	34	34			Protein - Phytic acid	30.2073	30.2073	30.3469	30	30	30			Fat - PH	200.272	200.272	200.497	34	34	34			LW - CL	15.7493	15.7493	15.653	31	31	31			DH - DM	76.844	76.844	77.4257	33	33	33
EL - EH	309.518	309.518	309.075	35	35	35			NT - PAH	31.727	31.727	31.6872	31	31	31			Ash - PH	200.581	200.581	200.806	35	35	35			Protein - Starch	15.8305	15.8305	15.8677	32	32	32			PH - DM	79.0099	79.0099	79.6984	34	34	34
DM - SW	316.499	316.499	316.335	36	36	36			PH - DM	36.0567	36.0567	35.944	32	32	32			Moisture - DM	205.725	205.725	206.064	36	36	36			Ash - Moisture	16.067	16.067	16.112	33	33	33			Starch - NGPS	90.973	90.973	91.041	35	35	35
EH - SW	318.17	318.17	318.488	37	37	37			Moisture - PAH	44.193	44.193	44.1798	33	33	33			NT - DM	206.216	206.216	206.551	37	37	37			Flavonoids - PEL	16.6354	16.6354	16.5997	34	34	34			Protein - NGPS	91.0678	91.0678	91.1434	36	36	36
PH - DM	341.999	341.999	340.904	38	38	38			Protein - Amylose	46.69	46.69	46.7872	34	34	34			Fat - DM	209.557	209.557	209.894	38	38	38			Fat - Flavonoids	17.7785	17.7785	17.8086	35	35	35			PH - SW	97.3258	97.3258	97.4338	37	37	37
Protein - DM	359.399	359.399	359.43	39	39	40			Amylose - NT	50.4215	50.4215	50.6177	35	35	35			Ash - DM	209.865	209.865	210.202	39	39	39			Ash - LW	18.6362	18.6362	18.579	36	36	36			DE - NGPS	99.2522	99.2522	99.3143	38	38	38
EH - PH	359.824	359.824	358.512	40	40	39			Fat - PAH	53.0116	53.0116	53.073	36	36	36			FW - NGPS	221.975	221.975	222.429	40	40	40			Starch - Flavonoids	18.8121	18.8121	18.8615	37	37	37			DH - SW	99.9003	99.9003	100.059	39	39	39
Protein - EH	360.846	360.846	360.93	41	41	41			PAH - SW	54.2205	54.2205	54.3139	37	37	37			Protein - NGPS	243.337	243.337	243.767	41	41	41			Protein - SW	19.2808	19.2808	19.5062	38	38	39			Moisture - NGPS	109.637	109.637	109.648	40	40	40
Fat - DM	371.907	371.907	371.77	42	42	43			LW - PAH	56.4468	56.4468	56.5409	38	38	38			Moisture - NGPS	248.982	248.982	249.392	42	42	42			Moisture - Flavonoids	19.4197	19.4197	19.4456	39	39	38			Fat - NGPS	111.168	111.168	111.224	41	41	41
Fat - EH	372.053	372.053	371.56	43	43	42			Ash - PAH	57.9533	57.9533	58.0393	39	39	39			NT - NGPS	249.467	249.467	249.873	43	43	43			Flavonoids - LL	20.1715	20.1715	20.1728	40	40	40			Ash - NGPS	112.427	112.427	112.516	42	42	42
Moisture - DM	377.094	377.094	377.106	44	44	44			Phytic acid - PAH	58.1014	58.1014	58.2009	40	40	40			Fat - NGPS	252.803	252.803	253.207	44	44	44			Protein - CL	20.2888	20.2888	20.3526	41	41	41			Flavonoids - NGPS	115.524	115.524	115.701	43	43	43
Moisture - EH	377.701	377.701	377.606	45	45	45			Moisture - Amylose	60.9887	60.9887	60.7133	41	41	41			Ash - NGPS	253.112	253.112	253.516	45	45	45			Flavonoids - LW	20.864	20.864	20.815	42	42	42			NGPS - DM	133.522	133.522	134.181	44	44	44
Ash - EH	384.785	384.785	384.268	46	46	46			Amylopectin - LL	63.2441	63.2441	63.6718	42	42	42			FL - NGPS	463.761	463.761	466.369	46	46	46			Protein - Flavonoids	21.8276	21.8276	21.7865	43	43	43			Starch - PH	145.525	145.525	145.634	45	45	45
Ash - DM	384.788	384.788	384.847	47	47	47			Amylose - LL	67.2878	67.2878	68.2645	43	43	44			FL - DM	507.008	507.008	508.857	47	47	47			Flavonoids - CL	22.9876	22.9876	23.0462	44	44	44			Protein - PH	145.668	145.668	145.769	46	46	46
DS - PH	490.855	490.855	492.042	48	48	48			Amylopectin - DF	67.4488	67.4488	67.4555	44	44	43			FL - PH	516.226	516.226	517.987	48	48	48			Ash - Protein	23.078	23.078	23.1912	45	45	45			Starch - DH	147.303	147.303	147.399	47	47	47
DT - PH	511.884	511.884	513.056	49	49	49			Fat - Amylose	69.5706	69.5706	69.396	45	45	45			DF - FL	558.372	558.372	559.8	49	49	49			LW - SW	23.4235	23.4235	23.346	46	46	46			Protein - DH	147.575	147.575	147.661	48	48	48
EL - PH	638.83	638.83	638.811	50	50	50			Amylose - SW	70.8853	70.8853	70.7236	46	46	46			FL - FW	685.649	685.649	684.821	50	50	50			Ash - Flavonoids	24.5994	24.5994	24.6563	47	47	47			DE - PH	153.606	153.606	153.712	49	49	49
PH - SW	647.48	647.48	648.774	51	51	51			Amylose - LW	72.9967	72.9967	72.7404	47	47	47			Protein - FL	706.987	706.987	705.734	51	51	51			Moisture - SW	25.5558	25.5558	25.6346	48	48	48			DE - DH	154.887	154.887	155.048	50	50	50
Protein - PH	690.3	690.3	689.914	52	52	52			Ash - Amylose	74.3483	74.3483	74.1552	48	48	48			Moisture - FL	712.625	712.625	711.263	52	52	52			LL - SW	26.3072	26.3072	26.3192	49	49	49			Moisture - PH	164.095	164.095	164.127	51	51	51
Fat - PH	702.459	702.459	702	53	53	53			Amylose - Phytic acid	74.5805	74.5805	74.1883	49	49	49			FL - NT	713.116	713.116	711.762	53	53	53			PEL - SW	27.047	27.047	27.0171	50	50	50			Moisture - DH	165.497	165.497	165.693	52	52	53
Moisture - PH	707.674	707.674	707.191	54	54	54			LL - PAH	75.0546	75.0546	75.205	50	50	50			Fat - FL	716.448	716.448	715.026	54	54	54			Flavonoids - SW	29.4173	29.4173	29.1686	51	51	51			Fat - PH	165.675	165.675	165.641	53	53	52
Ash - PH	715.214	715.214	715.28	55	55	55			Protein - LL	102.397	102.397	102.388	51	51	51			Ash - FL	716.757	716.757	715.325	55	55	55			Fat - SW	32.301	32.301	32.3447	52	52	52			Ash - PH	166.945	166.945	166.933	54	54	54
									LL - NT	105.425	105.425	105.134	52	52	52												Starch - SW	33.5382	33.5382	33.5685	53	53	53			Fat - DH	167.186	167.186	167.256	55	55	55
									DF - PH	113.455	113.455	114.044	53	53	53												CL - SW	38.5138	38.5138	38.3801	54	54	54			Ash - DH	168.479	168.479	168.551	56	56	56
									DF - LL	114.998	114.998	114.18	54	54	54												Ash - SW	41.2763	41.2763	41.2717	55	55	55			Flavonoids - PH	170.079	170.079	170.09	57	57	57
									Moisture - LL	118.436	118.436	118.136	55	55	55												DF - SW	58.2688	58.2688	58.457	56	56	56			Flavonoids - DH	171.701	171.701	171.74	58	58	58
									Amylose - Amylopectin	124.946	124.946	123.641	56	56	56												PH - DM	74.9719	74.9719	74.7724	57	57	57			DM - SW	175.91	175.91	176.116	59	59	59
									DF - DM	125.925	125.925	126.761	57	57	57												Protein - DF	76.9946	76.9946	77.1283	58	58	58			Starch - DM	223.793	223.793	223.681	60	60	60
									Fat - LL	127.379	127.379	127.045	58	58	58												DF - LW	81.2696	81.2696	81.6162	59	59	59			Protein - DM	224.01	224.01	223.918	61	61	61
									LL - SW	128.434	128.434	128.012	59	59	59												Flavonoids - DF	83.0023	83.0023	82.4717	60	60	60			DE - DM	231.558	231.558	231.308	62	62	62
									LL - LW	130.729	130.729	130.314	60	60	60												Moisture - DF	83.5138	83.5138	83.7136	61	61	61			Moisture - DM	242.14	242.14	241.878	63	63	63
									Ash - LL	132.263	132.263	131.881	61	61	62												DF - LL	84.3101	84.3101	84.5916	62	62	62			Fat - DM	243.795	243.795	243.343	64	64	64
									Phytic acid - LL	132.397	132.397	131.964	62	62	63												DF - PEL	84.8241	84.8241	84.9152	63	63	63			Ash - DM	245.081	245.081	244.632	65	65	65
									Amylopectin - PAH	132.444	132.444	131.877	63	63	61												Fat - DF	90.2509	90.2509	90.3323	64	64	64			Flavonoids - DM	248.275	248.275	247.764	66	66	66
									Protein - Amylopectin	160.024	160.024	159.447	64	64	64												Starch - DF	91.5121	91.5121	91.6106	65	65	65
									Amylopectin - NT	163.097	163.097	162.851	65	65	65												DF - CL	96.4532	96.4532	96.6147	66	66	66
									Amylopectin - PH	172.332	172.332	172.281	66	66	66												Ash - DF	99.3124	99.3124	99.4517	67	67	67
									Moisture - Amylopectin	175.842	175.842	175.835	67	67	67												DF - DM	126.471	126.471	127.841	68	68	68
									Amylose - DF	180.713	180.713	181.274	68	68	68												DM - SW	184.143	184.143	184.023	69	69	69
									Fat - Amylopectin	184.499	184.499	184.605	69	69	69												DF - PH	193.995	193.995	193.86	70	70	70
									Amylopectin - SW	185.691	185.691	185.805	70	70	71												Protein - DM	202.822	202.822	202.499	71	71	71
									Amylopectin - DM	186.332	186.332	184.885	71	71	70												LW - DM	207.212	207.212	206.725	72	72	72
									Amylopectin - LW	187.874	187.874	188.059	72	72	72												Flavonoids - DM	208.688	208.688	209.628	73	73	74
									DF - PAH	188.419	188.419	188.635	73	73	73												Moisture - DM	209.531	209.531	209.262	74	74	73
									Ash - Amylopectin	189.386	189.386	189.553	74	74	74												LL - DM	210.274	210.274	209.877	75	75	75
									Amylopectin - Phytic acid	189.503	189.503	189.759	75	75	75												PEL - DM	211.024	211.024	210.947	76	76	76
									Protein - DF	215.152	215.152	215.555	76	76	76												Fat - DM	216.39	216.39	216.339	77	77	77
									DF - NT	218.076	218.076	218.162	77	77	77												Starch - DM	217.644	217.644	217.541	78	78	78
									LL - PH	222.921	222.921	222.196	78	78	78												CL - DM	222.598	222.598	222.215	79	79	79
									Moisture - DF	231.267	231.267	231.405	79	79	79												Ash - DM	225.408	225.408	225.142	80	80	80
									LL - DM	239.513	239.513	239.159	80	80	80												PH - SW	251.699	251.699	251.559	81	81	81
									Fat - DF	239.957	239.957	240.166	81	81	81												Protein - PH	269.658	269.658	269.57	82	82	82
									DF - SW	240.972	240.972	241.073	82	82	82												LW - PH	274.183	274.183	274.25	83	83	83
									DF - LW	243.235	243.235	243.39	83	83	83												Flavonoids - PH	276.223	276.223	276.197	84	84	84
									Ash - DF	244.803	244.803	244.953	84	84	84												Moisture - PH	276.444	276.444	276.484	85	85	85
									Phytic acid - DF	244.881	244.881	245.068	85	85	85												LL - PH	277.307	277.307	277.333	86	86	86
									Amylose - PH	286.473	286.473	285.703	86	86	86												PEL - PH	277.926	277.926	278.026	87	87	87
									PAH - PH	296.751	296.751	297.025	87	87	87												Fat - PH	283.504	283.504	283.537	88	88	88
									Amylose - DM	304.491	304.491	303.998	88	88	88												Starch - PH	284.721	284.721	284.771	89	89	89
									PAH - DM	313.69	313.69	313.592	89	89	89												CL - PH	289.492	289.492	289.649	90	90	90
									Protein - PH	324.128	324.128	324.517	90	90	90												Ash - PH	292.419	292.419	292.519	91	91	91
									NT - PH	327.163	327.163	327.295	91	91	91
									Moisture - PH	340.282	340.282	340.206	92	92	92
									Protein - DM	340.773	340.773	341.022	93	93	93
									NT - DM	343.732	343.732	343.875	94	94	94
									Fat - PH	349.042	349.042	349.143	95	95	95
									PH - SW	350.076	350.076	350.09	96	96	96
									LW - PH	352.349	352.349	352.387	97	97	97
									Ash - PH	353.913	353.913	353.961	98	98	98
									Phytic acid - PH	354.015	354.015	354.017	99	99	99
									Moisture - DM	356.912	356.912	357.03	100	100	100
									Fat - DM	365.653	365.653	365.88	101	101	101
									DM - SW	366.682	366.682	366.866	102	102	102
									LW - DM	368.949	368.949	369.173	103	103	103
									Ash - DM	370.514	370.514	370.73	104	104	104
									Phytic acid - DM	370.603	370.603	370.849	105	105	105
